# Supplementary material for: Thymidine phosphorylase activates NFκB and stimulates the expression of angiogenic and metastatic factors in human cancer cells
Source: PubMed Central journal article supplement (PMC4279387; doi:10.18632/oncotarget.2242), 2014-10-31
Supplement: oncotarget-05-10473-s001.pdf [file oncotarget-05-10473-s001.pdf]

## SUPPLEMENTARY TABLES

**Supplementary Table S1.** NF $\kappa$ B-regulated genes expressed at higher levels in KB/TP compared with KB/CV.

| No. | Gene Symbol | Genbank Accession | *Ratio     |
|-----|-------------|-------------------|------------|
| 1   | C4BPA       | NM_000715         | 232.834824 |
| 2   | IL11        | NM_000641         | 23.6658529 |
| 3   | TNFSF15     | NM_005118         | 20.1061212 |
| 4   | ABCA1       | NM_005502         | 12.3831103 |
| 5   | BMP4        | NM_001202         | 10.7789127 |
| 6   | KISS1       | NM_002256         | 10.5635615 |
| 7   | EBI3        | NM_005755         | 10.2906536 |
| 8   | DIO2        | NM_013989         | 10.1987009 |
| 9   | ENG         | NM_000118         | 9.51997592 |
| 10  | CXCL10      | NM_001565         | 9.02181919 |
| 11  | CD86        | NM_006889         | 8.19546473 |
| 12  | ADORA1      | NM_000674         | 8.15746054 |
| 13  | ABCC6       | NM_001171         | 8.14736149 |
| 14  | PDGFB       | NM_002608         | 7.7486742  |
| 15  | C3          | NM_000064         | 7.2678143  |
| 16  | CCL5        | NM_002985         | 7.06106394 |
| 17  | SKALP, PI3  | NM_002638         | 7.01803356 |
| 18  | ST6GAL1     | NM_173216         | 6.91645368 |
| 19  | CXCL11      | NM_005409         | 6.68221562 |
| 20  | IL6         | NM_000600         | 6.37254526 |
| 21  | ENO2        | NM_001975         | 5.84153846 |
| 22  | MYB         | NM_005375         | 5.36958059 |
| 23  | GBP1        | NM_002053         | 5.06729041 |
| 24  | FCGRT       | NM_004107         | 4.81283197 |
| 25  | F11R        | NM_144503         | 4.61239598 |
| 26  | IL8         | NM_000584         | 4.54960632 |
| 27  | LAMB2       | NM_002292         | 4.52402276 |
| 28  | ADAM19      | NM_023038         | 4.34813149 |
| 29  | ALOX5       | NM_000698         | 4.09355742 |
| 30  | FN1         | NM_212482         | 3.92905771 |
| 31  | GAD1        | NM_000817         | 3.57324744 |
| 32  | CCR7        | NM_001838         | 3.33221557 |
| 33  | CFB         | NM_001710         | 3.04479532 |
| 34  | TNFSF10     | NM_003810         | 2.98582663 |
| 35  | CCND1       | NM_053056         | 2.84391832 |

| No. | Gene Symbol | Genbank Accession | *Ratio     |
|-----|-------------|-------------------|------------|
| 36  | XDH         | NM_000379         | 2.74476351 |
| 37  | PSMB9       | NM_002800         | 2.6939827  |
| 38  | CCL1        | NM_002981         | 2.59502851 |
| 39  | CSF1        | NM_172212         | 2.57493128 |
| 40  | CTSB        | NM_147780         | 2.48471773 |
| 41  | NLRP2       | NM_017852         | 2.45039592 |
| 42  | TGM2        | NM_004613         | 2.39482317 |
| 43  | IFNB1       | NM_002176         | 2.37543914 |
| 44  | PTGES       | NM_004878         | 2.33829367 |
| 45  | MMP1        | NM_002421         | 2.28658125 |
| 46  | DPYD        | NM_000110         | 2.14380168 |
| 47  | PTGIS       | NM_000961         | 2.03446736 |
| 48  | TNFSF13B    | NM_006573         | 2.01208417 |

\*Expression level of each gene in KB/TP was divided by that in KB/CV.

**Supplementary Table S2.** Primers sequences of real-time PCR

| Gene Name | Forward Primer                  | Reverse Primer                 |
|-----------|---------------------------------|--------------------------------|
| TP        | 5'-GCTGGAGTCTATTCCTGGATTC-3'    | 5'-ACTGAGAATGGAGGCTGTGATG-3'   |
| IL-8      | 5'-CCTGATTTCTGCAGCTCTGTGT-3'    | 5'-GGTGGAAAGGTTTGGAGTATGTCT-3' |
| GAPDH     | 5'-GTCAACGGATTTGGTCGTAT-3'      | 5'-TGGTGATGGGATTTCCATTG-3'     |
| IL11      | 5'-GACAAATCCCAGCTGACG-3'        | 5'-GTAGGACAGTAGGTCCGC-3'       |
| BMP4      | 5'-CTACATGCGGGATCTTTACC-3'      | 5'-TGGGATGTTCTCCAGATGTT-3'     |
| PDGFB     | 5'-ATTCCCGAGGAGCTTTATGA-3'      | 5'-GTCATGTTCCAGGTCCAATC-3'     |
| FN1       | 5'-GAATAAGCTGTACCATCGCA-3'      | 5'-GGTGTCACCAATCTTGTAGG-3'     |
| CCL5      | 5'-CTGTCATCCTCATTGCTACTG-3'     | 5'-GCCACTGGTGTAGAAATACTC-3'    |
| MMP-1     | 5'-GCATCCAAGCCATATATGGAC-3'     | 5'-GTATCCGTGTAGCACATTCTG-3'    |
| IL-6      | 5'-CCTCTTCAGAACGAATTGAC-3'      | 5'-AGTCTCCTCATTGAATCCAG-3'     |
| XDH       | 5'-GGAACGAGCTTTATTCCACATGGAC-3' | 5'-GATACTGAGAGCTTGCATGGCATT-3' |
